# Supplementary figures and images for: KNSTRN, a Poor Prognostic Biomarker, Affects the Tumor Immune Microenvironment and Immunotherapy Outcomes in Pan-Cancer
Source: Hindawi journal article supplement (doi:10.1155/2023/6729717), 2023-02-15

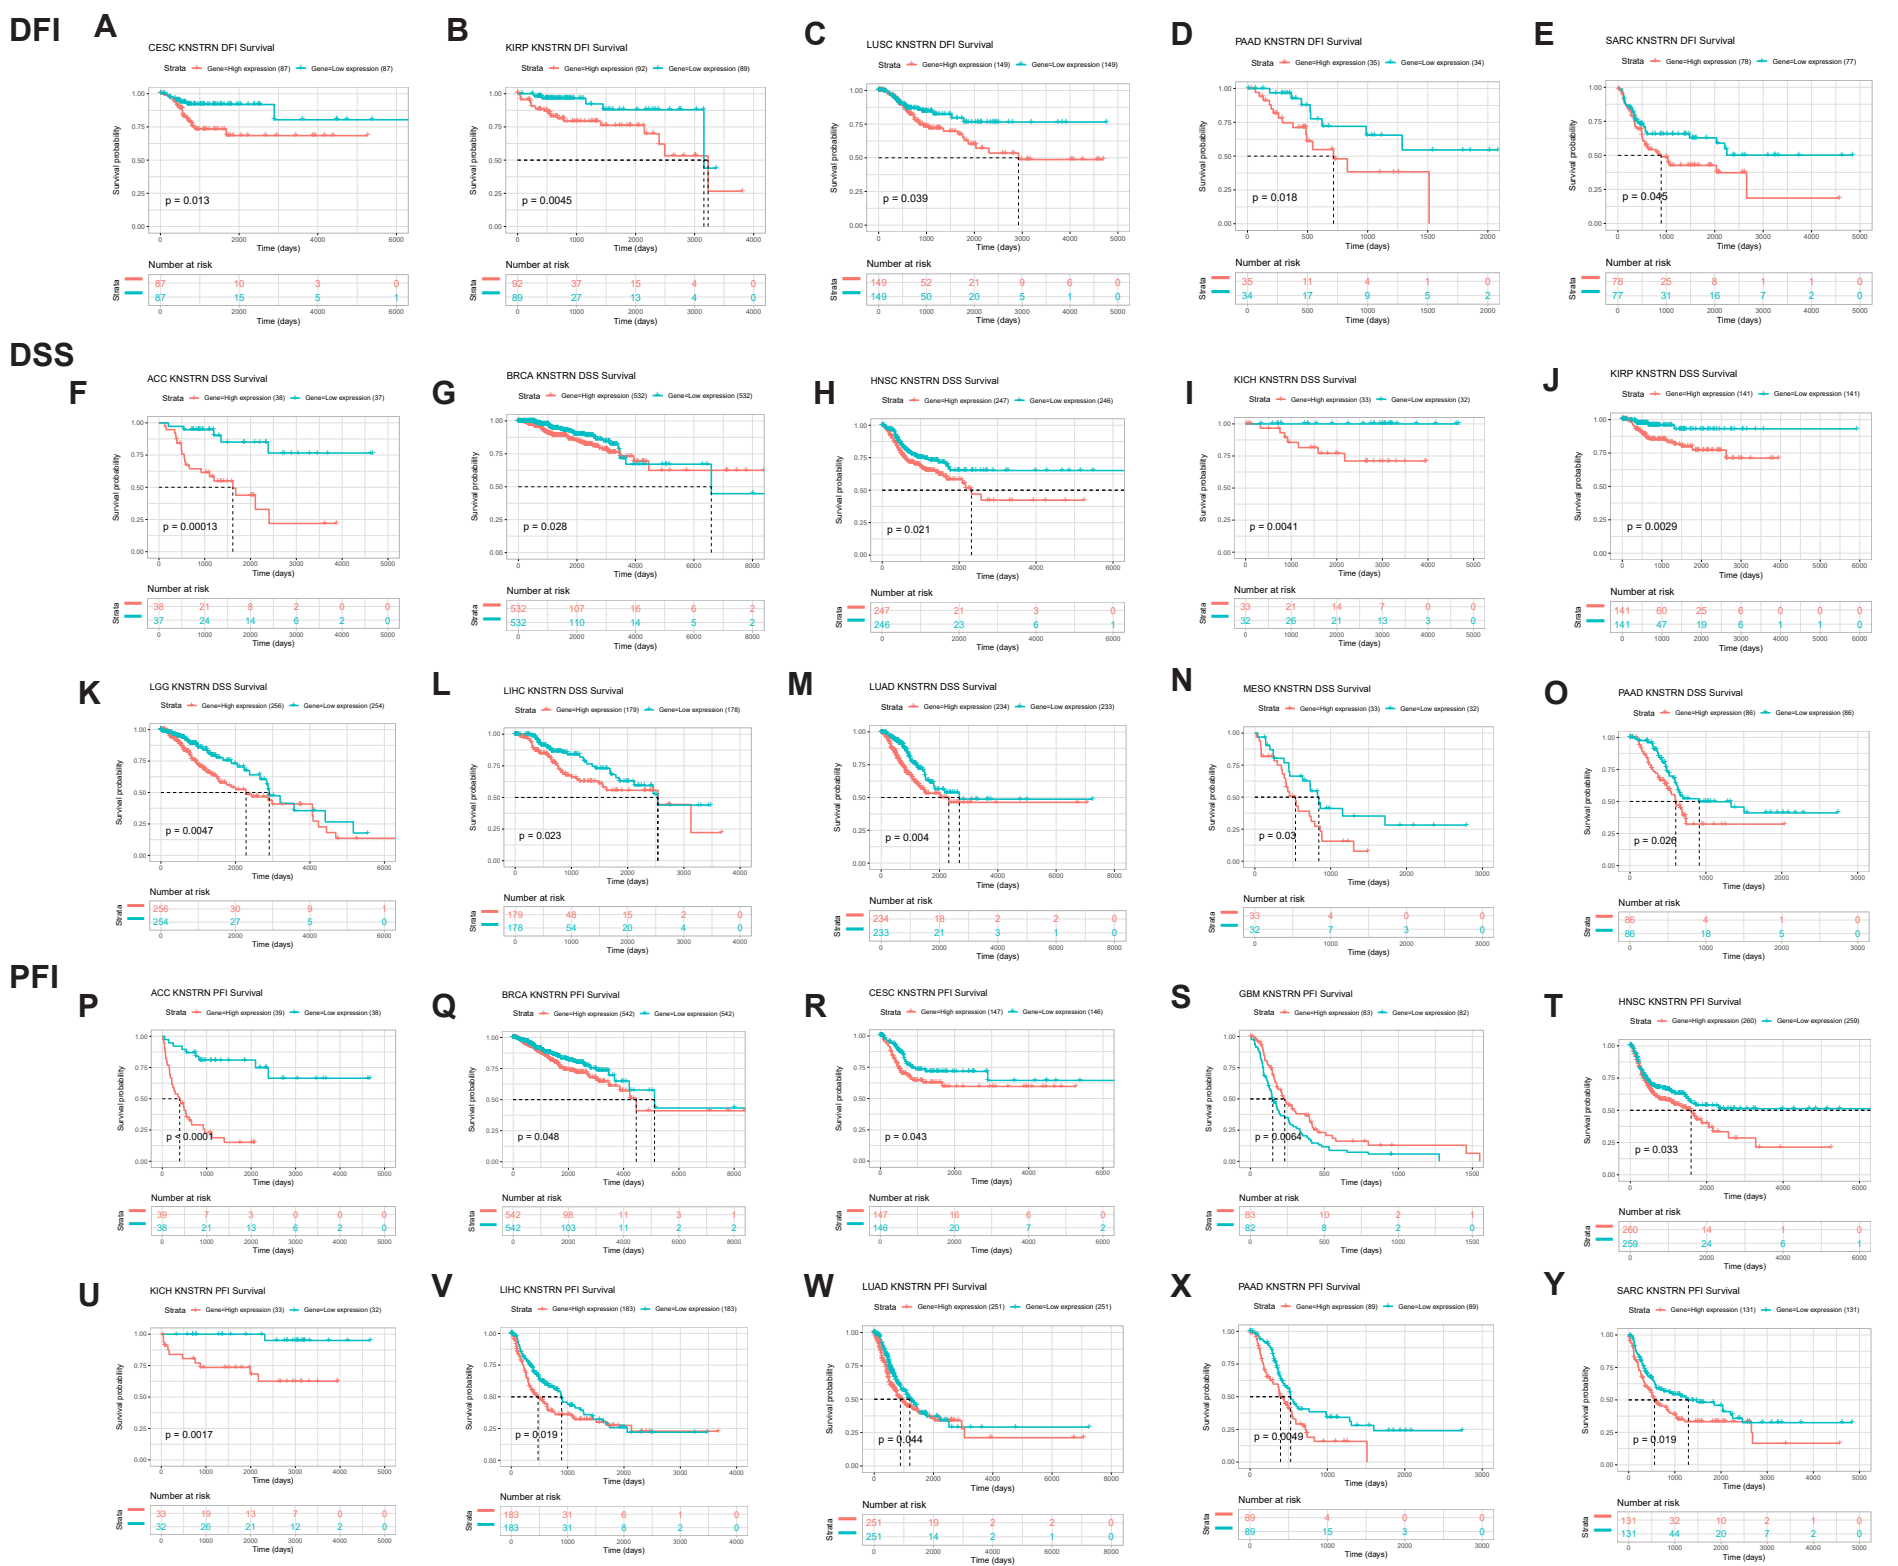

Supplement: f1 [file 6729717.f1.zip]

NK resting cells

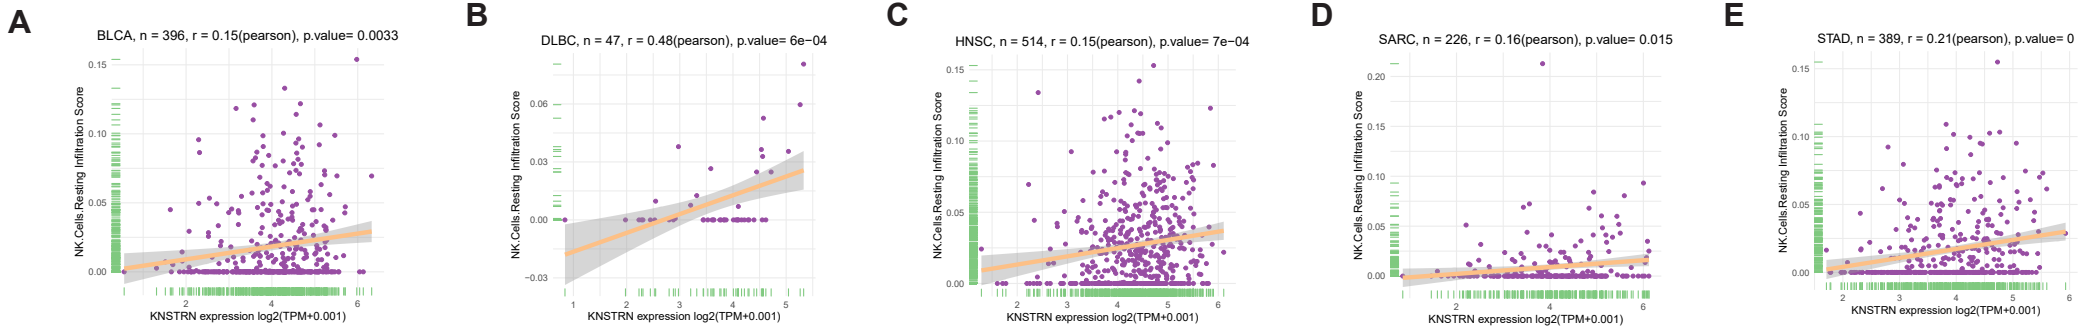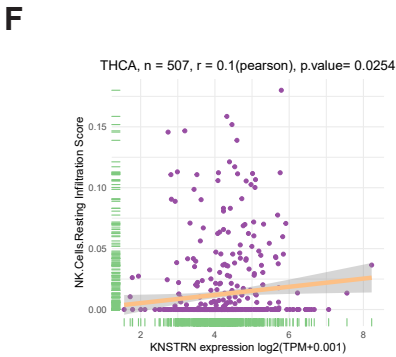

Macrophage

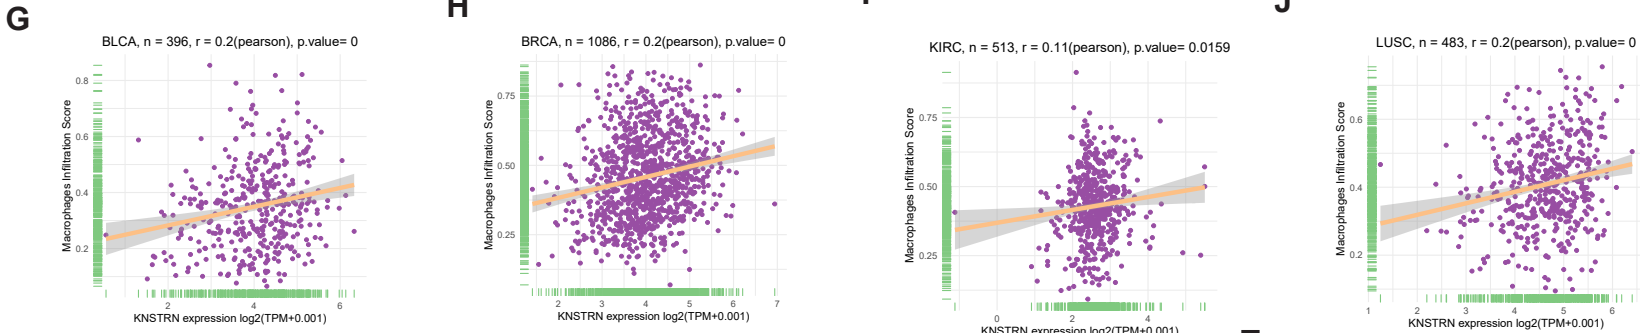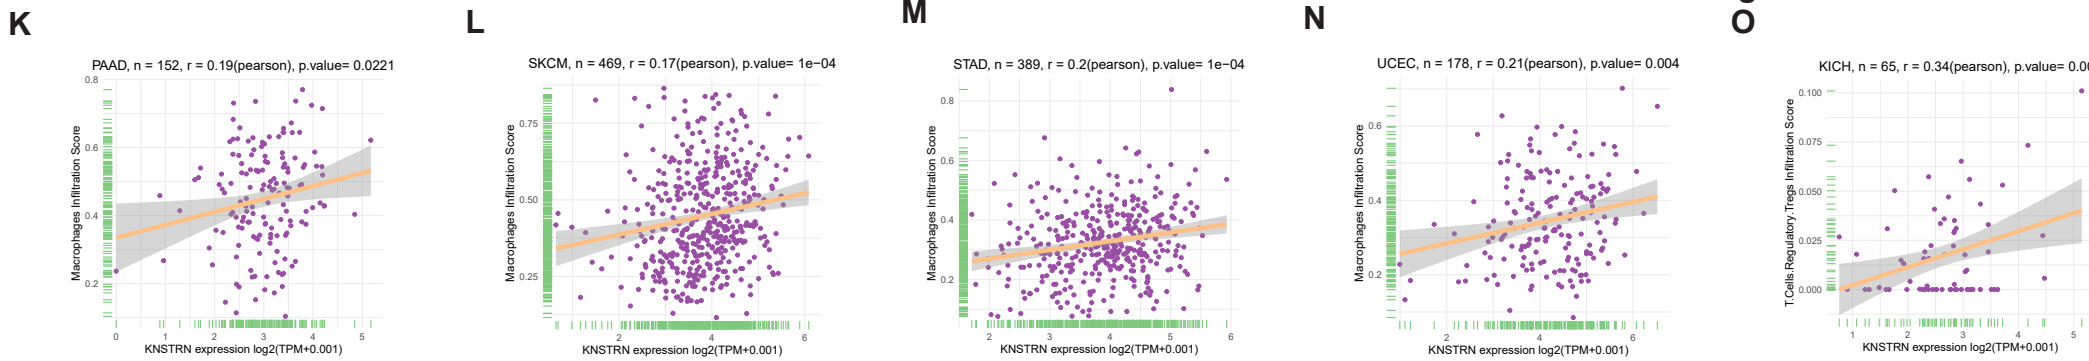

Neutrophils

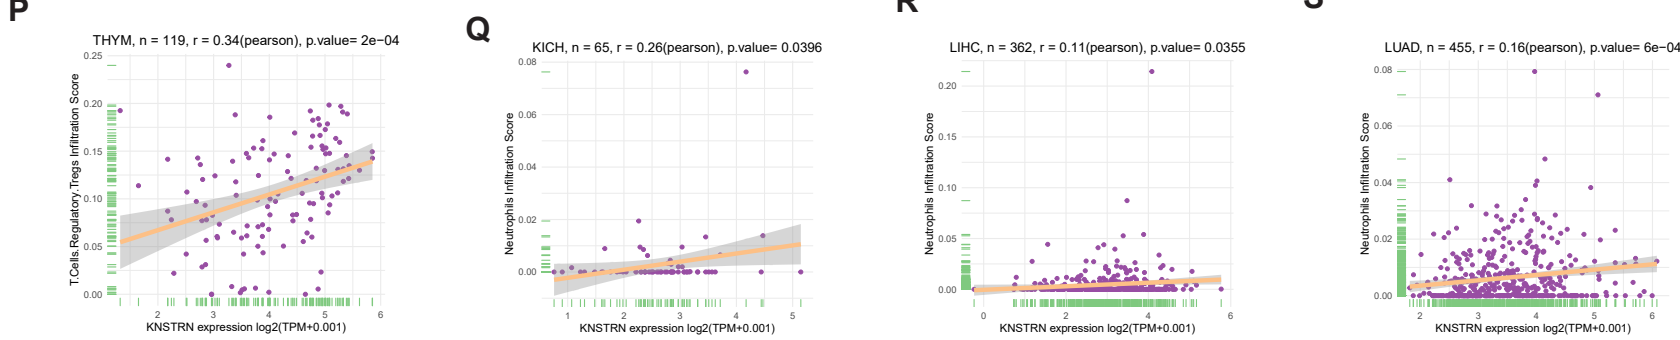

Supplement: f1 [file 6729717.f1.zip]

**A**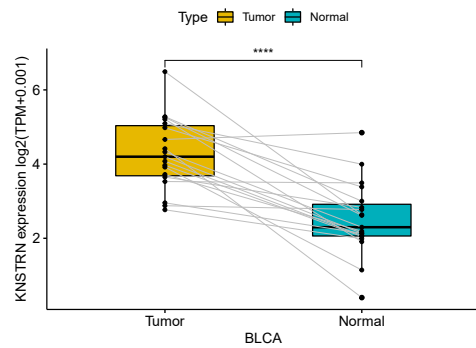**B**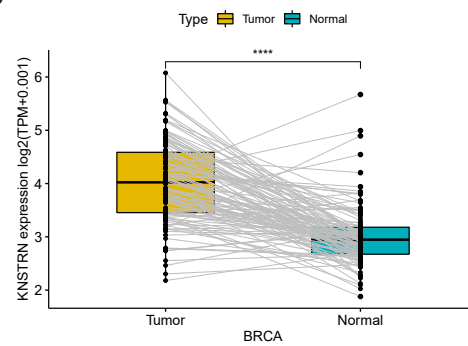**C**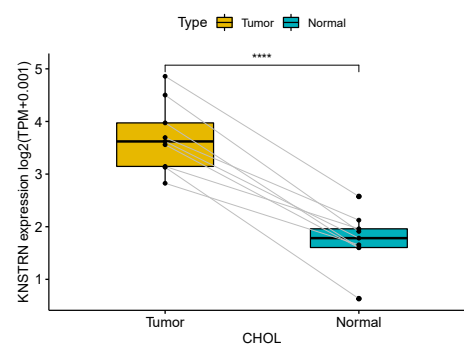**D**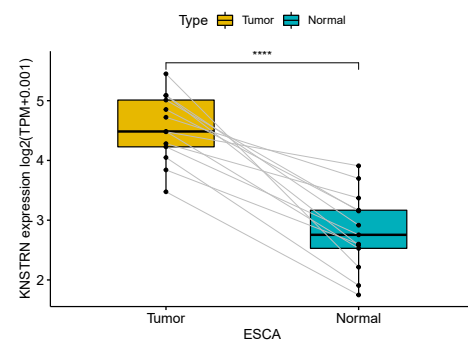**E**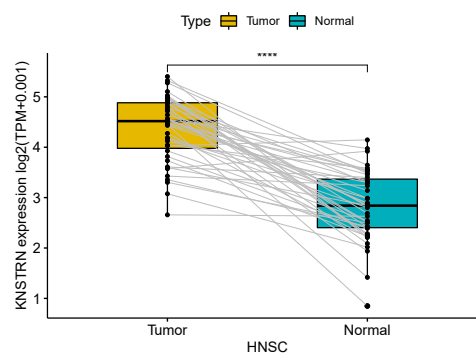**F**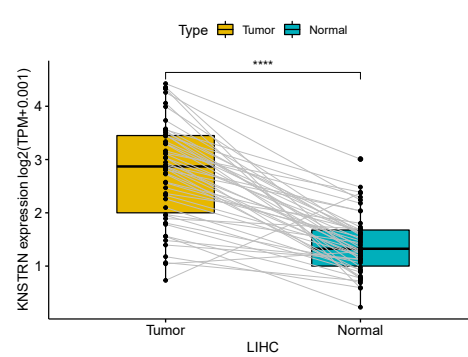**G**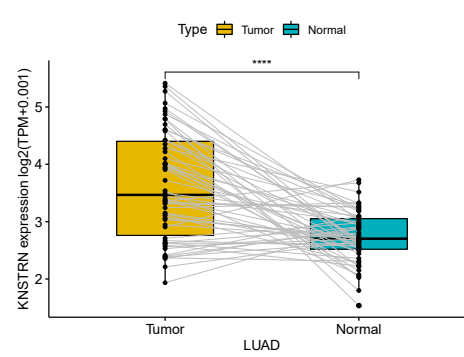**H**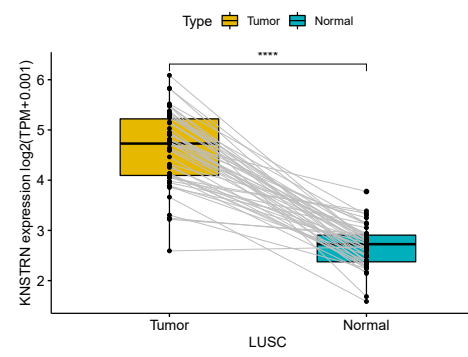**I**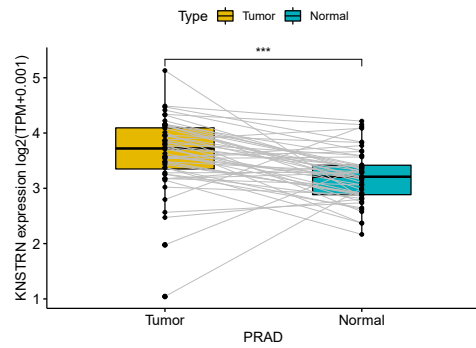**J**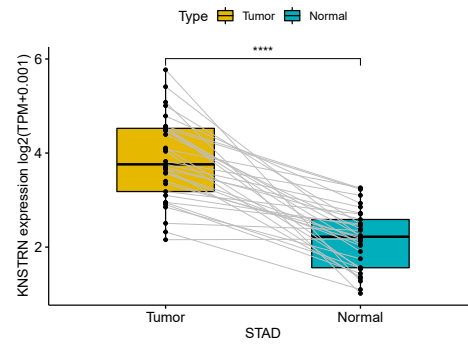**K**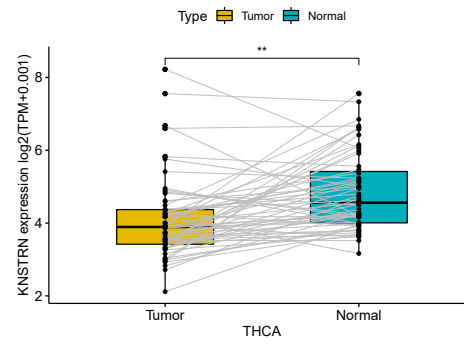**L**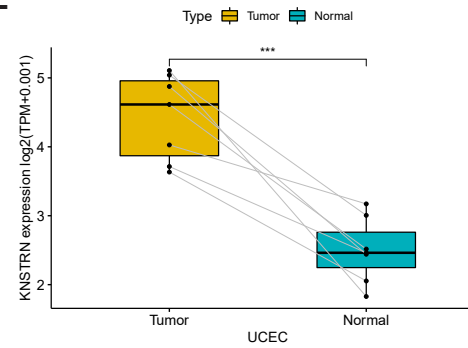

Supplement: f1 [file 6729717.f1.zip]
